# Supplementary material
Source: HighWire-hosted journal article supplement (doi:10.1101/rna.078915.121)
Supplement: Supplemental_Material_Tables.docx [file Supplemental_Material_Tables.docx]

**Derivation for Eq 5:**

Equilibrium of duplex formation:

A + A ⇌ D

Equilibrium constant for duplex formation, KD = (i)

Equilibrium of hairpin formation:

A ⇌ H

Equilibrium constant for hairpin formation, KH = (ii)

Considering all RNA strands are forming either duplex or hairpin (assuming insignificant contribution from random coil), the total concentration of the strands will be, [A]T = 2[D] + [H]

⇒ [A]T = 2 KD [A] [A] + [H] [From (i) ]

⇒ [A]T = 2 KD . + [H] [From (ii) ]

⇒ 2 . [H] [H] + [H] - [A]T = 0

Therefore, [H] =

Table S1: List of RNA pentaloops found in the secondary structure database

| Data set 1: Pentaloop with closing base pair | | | Data set 2: Pentaloop without closing base pair | | | Data set 3: Closing base pair | | | Data set 4: Pentaloop nucleotides classified as purine (R) or pyrimidine (Y) | | |
| --- | --- | --- | --- | --- | --- | --- | --- | --- | --- | --- | --- |
| Sequencea | Frequencyb | Percentc | Sequencea | Frequencyb | Percentc | Sequencea | Frequencyb | Percentc | Sequencea | Frequencyb | Percentc |
| C(GGCGA)G | 63 | 4.0 | UGUUC | 102 | 6.4 | CG | 455 | 28.6 | RRYRR | 184 | 11.6 |
| C(UGUUC)G | 58 | 3.7 | GGCGA | 95 | 6.0 | GC | 376 | 23.7 | YYYRY | 129 | 8.1 |
| G(UAAGU)U | 56 | 3.5 | UAAGU | 56 | 3.5 | UA | 289 | 18.2 | RRRRR | 113 | 7.1 |
| G(GUAAG)C | 44 | 2.8 | GUAAG | 47 | 3.0 | UG | 205 | 12.9 | YRYYY | 110 | 6.9 |
| G(CUCAA)C | 41 | 2.6 | CUCAA | 41 | 2.6 | AU | 179 | 11.3 | YYYRR | 107 | 6.7 |
| U(UGUUC)A | 37 | 2.3 | GAAAG | 39 | 2.5 | GU | 85 | 5.3 | YRRRY | 105 | 6.6 |
| A(GAGAA)U | 35 | 2.2 | GAAAU | 39 | 2.5 |  |  |  | RYYRR | 94 | 5.9 |
| U(AAUUA)A | 34 | 2.1 | UUCGU | 38 | 2.4 |  |  |  | RRRYR | 78 | 4.9 |
| G(UUCGU)C | 32 | 2.0 | GAGAA | 37 | 2.3 |  |  |  | RYRRR | 72 | 4.5 |
| U(ACCAA)A | 30 | 1.9 | AAUUA | 35 | 2.2 |  |  |  | RRRRY | 64 | 4.0 |
| U(GAAAG)G | 29 | 1.8 | ACCAA | 32 | 2.0 |  |  |  | YRRYY | 58 | 3.7 |
| G(CUUAA)C | 21 | 1.3 | UAAUU | 29 | 1.8 |  |  |  | RRYYR | 49 | 3.1 |
| A(GAAAU)U | 19 | 1.2 | GAAUA | 26 | 1.6 |  |  |  | RYRRY | 48 | 3.0 |
| U(GAAUA)G | 19 | 1.2 | CUUGU | 25 | 1.6 |  |  |  | YYYYY | 41 | 2.6 |
| U(GAACA)G | 17 | 1.1 | GAACA | 21 | 1.3 |  |  |  | YRRYR | 38 | 2.4 |
| G(UAAUU)C | 17 | 1.1 | CUUAA | 21 | 1.3 |  |  |  | YYRRY | 34 | 2.1 |
| U(GAAAU)G | 16 | 1.0 | GAUAA | 20 | 1.3 |  |  |  | YYRYY | 31 | 2.0 |
| C(CUUGU)G | 16 | 1.0 | UUUUU | 19 | 1.2 |  |  |  | YRYRR | 28 | 1.8 |
| U(GGCGA)G | 15 | 0.9 | UAAAU | 17 | 1.1 |  |  |  | RYYRY | 24 | 1.5 |
| G(CAAAU)C | 13 | 0.8 | UUUAU | 15 | 0.9 |  |  |  | RYYYR | 24 | 1.5 |
| A(GCAGU)U | 12 | 0.8 | CAAAU | 14 | 0.9 |  |  |  | YRRRR | 20 | 1.3 |
| U(AUCAA)A | 11 | 0.7 | CUCGU | 13 | 0.8 |  |  |  | RYYYY | 18 | 1.1 |
| G(CUCGU)C | 11 | 0.7 | GACAA | 13 | 0.8 |  |  |  | YRYRY | 17 | 1.1 |
| C(GUAAU)G | 10 | 0.6 | AUCAA | 13 | 0.8 |  |  |  | YYRYR | 17 | 1.1 |
| A(GAGUA)U | 9 | 0.6 | GUAAU | 13 | 0.8 |  |  |  | RYRYY | 16 | 1.0 |
| U(GACAA)A | 9 | 0.6 | GAAAA | 12 | 0.8 |  |  |  | RYRYR | 16 | 1.0 |
| C(CUUGC)G | 9 | 0.6 | GCAGU | 12 | 0.8 |  |  |  | YYYYR | 16 | 1.0 |
| U(GGCGA)A | 9 | 0.6 | GAAAC | 11 | 0.7 |  |  |  | YYRRR | 12 | 0.8 |
| C(GACGA)G | 9 | 0.6 | GUCAA | 11 | 0.7 |  |  |  | YRYYR | 9 | 0.6 |
| C(UUUUU)G | 9 | 0.6 | GACGA | 11 | 0.7 |  |  |  | RRRYY | 6 | 0.4 |
| C(GAAAC)G | 8 | 0.5 | UAAUA | 10 | 0.6 |  |  |  | RRYRY | 6 | 0.4 |
| U(UAAUA)G | 8 | 0.5 | GUUAA | 10 | 0.6 |  |  |  | RRYYY | 5 | 0.3 |
| U(UAAAU)A | 7 | 0.4 | UUAUC | 10 | 0.6 |  |  |  |  |  |  |
| U(UAAUU)G | 7 | 0.4 | AAUAA | 10 | 0.6 |  |  |  |  |  |  |
| G(UUAAU)C | 7 | 0.4 | UUAAU | 9 | 0.6 |  |  |  |  |  |  |
| U(UGUUC)G | 7 | 0.4 | UAACG | 9 | 0.6 |  |  |  |  |  |  |
| U(UCAUA)G | 7 | 0.4 | CUUGC | 9 | 0.6 |  |  |  |  |  |  |
| G(UGAUC)C | 7 | 0.4 | GAGUA | 9 | 0.6 |  |  |  |  |  |  |
| G(UUAUC)C | 7 | 0.4 | GAAGA | 9 | 0.6 |  |  |  |  |  |  |
| U(GAUAA)G | 7 | 0.4 | GCACU | 8 | 0.5 |  |  |  |  |  |  |
| U(GAUAA)A | 7 | 0.4 | UUUAC | 8 | 0.5 |  |  |  |  |  |  |
| U(AAUAA)A | 7 | 0.4 | UGAUC | 8 | 0.5 |  |  |  |  |  |  |
| G(GCACU)U | 6 | 0.4 | GGUGA | 8 | 0.5 |  |  |  |  |  |  |
| C(GUUGA)G | 6 | 0.4 | UAACU | 7 | 0.4 |  |  |  |  |  |  |
| G(UAAAU)C | 6 | 0.4 | CUUGA | 7 | 0.4 |  |  |  |  |  |  |
| U(ACUAA)A | 6 | 0.4 | ACUAA | 7 | 0.4 |  |  |  |  |  |  |
| G(CUCAG)C | 6 | 0.4 | UCAUA | 7 | 0.4 |  |  |  |  |  |  |
| A(GAAAG)U | 6 | 0.4 | UUCGG | 7 | 0.4 |  |  |  |  |  |  |
| G(GUCGU)C | 6 | 0.4 | GCAAU | 7 | 0.4 |  |  |  |  |  |  |
| U(AUUAA)A | 5 | 0.3 | UUCGC | 7 | 0.4 |  |  |  |  |  |  |
| G(GGCGA)C | 5 | 0.3 | GUUUA | 6 | 0.4 |  |  |  |  |  |  |
| U(GUCAA)A | 5 | 0.3 | GUUGA | 6 | 0.4 |  |  |  |  |  |  |
| U(UGCAA)A | 5 | 0.3 | AUAAG | 6 | 0.4 |  |  |  |  |  |  |
| U(AAAUA)A | 5 | 0.3 | GCUAA | 6 | 0.4 |  |  |  |  |  |  |
| C(UUUAU)G | 5 | 0.3 | CUCAG | 6 | 0.4 |  |  |  |  |  |  |
| G(UUUAU)C | 5 | 0.3 | GUCGU | 6 | 0.4 |  |  |  |  |  |  |
| C(GAAUA)G | 5 | 0.3 | AACAA | 5 | 0.3 |  |  |  |  |  |  |
| G(UAACG)C | 5 | 0.3 | CUCGA | 5 | 0.3 |  |  |  |  |  |  |
| C(GUUUA)G | 5 | 0.3 | UGCAA | 5 | 0.3 |  |  |  |  |  |  |
| U(AACAA)A | 5 | 0.3 | GAGCA | 5 | 0.3 |  |  |  |  |  |  |
| C(AUAUA)G | 5 | 0.3 | CGAAA | 5 | 0.3 |  |  |  |  |  |  |
| U(CUUGU)A | 4 | 0.3 | AAAUA | 5 | 0.3 |  |  |  |  |  |  |
| C(GAUAA)G | 4 | 0.3 | AUAUA | 5 | 0.3 |  |  |  |  |  |  |
| G(CUAAU)C | 4 | 0.3 | GUCUA | 5 | 0.3 |  |  |  |  |  |  |
| C(UUCGU)G | 4 | 0.3 | GAUGA | 5 | 0.3 |  |  |  |  |  |  |
| U(GAAAA)G | 4 | 0.3 | AUUAA | 5 | 0.3 |  |  |  |  |  |  |
| C(GCAAU)G | 4 | 0.3 | UAACA | 4 | 0.3 |  |  |  |  |  |  |
| A(UUUAC)U | 4 | 0.3 | UUCUU | 4 | 0.3 |  |  |  |  |  |  |
| C(GAAGA)G | 4 | 0.3 | GGUAA | 4 | 0.3 |  |  |  |  |  |  |
| C(GAACA)G | 4 | 0.3 | UAGCA | 4 | 0.3 |  |  |  |  |  |  |
| C(AUCCC)G | 4 | 0.3 | AUCCC | 4 | 0.3 |  |  |  |  |  |  |
| C(CUUGA)G | 4 | 0.3 | CAAGU | 4 | 0.3 |  |  |  |  |  |  |
| C(AUAAG)G | 4 | 0.3 | AUUGC | 4 | 0.3 |  |  |  |  |  |  |
| G(GUCAA)C | 4 | 0.3 | UUAUU | 4 | 0.3 |  |  |  |  |  |  |
| U(UUUUU)G | 4 | 0.3 | UUAGG | 4 | 0.3 |  |  |  |  |  |  |
| C(GCAAC)G | 4 | 0.3 | UAAAA | 4 | 0.3 |  |  |  |  |  |  |
| A(UUUUU)U | 4 | 0.3 | UUCAU | 4 | 0.3 |  |  |  |  |  |  |
| U(UAGCA)G | 4 | 0.3 | CUAAU | 4 | 0.3 |  |  |  |  |  |  |
| C(GAAAA)G | 3 | 0.2 | CUAGU | 4 | 0.3 |  |  |  |  |  |  |
| A(GGUAG)U | 3 | 0.2 | CACAA | 4 | 0.3 |  |  |  |  |  |  |
| C(CUCGA)G | 3 | 0.2 | GCAAC | 4 | 0.3 |  |  |  |  |  |  |
| C(UUCGC)G | 3 | 0.2 | CUUCG | 3 | 0.2 |  |  |  |  |  |  |
| C(GUCUA)G | 3 | 0.2 | UUCCU | 3 | 0.2 |  |  |  |  |  |  |
| U(UAAAA)G | 3 | 0.2 | CUGAU | 3 | 0.2 |  |  |  |  |  |  |
| G(UAACU)C | 3 | 0.2 | GGGCA | 3 | 0.2 |  |  |  |  |  |  |
| C(GAAAU)G | 3 | 0.2 | UAUAA | 3 | 0.2 |  |  |  |  |  |  |
| G(UUCGC)C | 3 | 0.2 | GUUCA | 3 | 0.2 |  |  |  |  |  |  |
| G(GAAAA)C | 3 | 0.2 | UAUAU | 3 | 0.2 |  |  |  |  |  |  |
| C(GUUCA)G | 3 | 0.2 | GGUAG | 3 | 0.2 |  |  |  |  |  |  |
| C(GCUAA)G | 3 | 0.2 | GGAGA | 3 | 0.2 |  |  |  |  |  |  |
| U(GUUAA)A | 3 | 0.2 | AAUCA | 3 | 0.2 |  |  |  |  |  |  |
| U(GAGCA)G | 3 | 0.2 | CUUUG | 3 | 0.2 |  |  |  |  |  |  |
| G(AUUAU)C | 3 | 0.2 | CUUUU | 3 | 0.2 |  |  |  |  |  |  |
| C(UGCGA)G | 3 | 0.2 | AUUUU | 3 | 0.2 |  |  |  |  |  |  |
| U(UAACU)G | 3 | 0.2 | AAAAU | 3 | 0.2 |  |  |  |  |  |  |
| G(AAAAU)C | 3 | 0.2 | UUUGA | 3 | 0.2 |  |  |  |  |  |  |
| A(GGCGA)U | 3 | 0.2 | CAAUU | 3 | 0.2 |  |  |  |  |  |  |
| G(CUUGU)C | 3 | 0.2 | UGCGA | 3 | 0.2 |  |  |  |  |  |  |
| C(UAACG)G | 3 | 0.2 | GUAUA | 3 | 0.2 |  |  |  |  |  |  |
| G(CGAAA)C | 3 | 0.2 | UGAGU | 3 | 0.2 |  |  |  |  |  |  |
| C(UUACC)G | 3 | 0.2 | UUGUA | 3 | 0.2 |  |  |  |  |  |  |
| A(AAUAA)U | 3 | 0.2 | UUACC | 3 | 0.2 |  |  |  |  |  |  |
| C(GGUGA)G | 3 | 0.2 | UGCCC | 3 | 0.2 |  |  |  |  |  |  |
| A(UUGUA)U | 3 | 0.2 | AAAUU | 3 | 0.2 |  |  |  |  |  |  |
| G(UUCGG)C | 3 | 0.2 | UUCAG | 3 | 0.2 |  |  |  |  |  |  |
| U(CACAA)A | 3 | 0.2 | UUCAA | 3 | 0.2 |  |  |  |  |  |  |
| G(CUUCG)C | 3 | 0.2 | AAAGC | 3 | 0.2 |  |  |  |  |  |  |
| G(CUGAU)C | 3 | 0.2 | GUAAA | 3 | 0.2 |  |  |  |  |  |  |
| A(GCAAU)U | 3 | 0.2 | AAACA | 3 | 0.2 |  |  |  |  |  |  |
| C(GGUAA)G | 3 | 0.2 | GCAAG | 3 | 0.2 |  |  |  |  |  |  |
| U(GCUAA)A | 3 | 0.2 | UGAAA | 3 | 0.2 |  |  |  |  |  |  |
| G(GAUGA)C | 3 | 0.2 | AUUAU | 3 | 0.2 |  |  |  |  |  |  |
| G(GUUAA)C | 3 | 0.2 | GCCCA | 2 | 0.1 |  |  |  |  |  |  |
| C(UGCCC)G | 3 | 0.2 | GCGAA | 2 | 0.1 |  |  |  |  |  |  |
| G(UUCUU)C | 3 | 0.2 | UAAUC | 2 | 0.1 |  |  |  |  |  |  |
| U(GUUAA)G | 3 | 0.2 | UAAUG | 2 | 0.1 |  |  |  |  |  |  |
| G(UUCCU)C | 3 | 0.2 | GUUUC | 2 | 0.1 |  |  |  |  |  |  |
| A(UUUAU)U | 3 | 0.2 | CGUAA | 2 | 0.1 |  |  |  |  |  |  |
| U(GAAGA)G | 3 | 0.2 | GUUUU | 2 | 0.1 |  |  |  |  |  |  |
| C(GUAUA)G | 2 | 0.1 | UAUAC | 2 | 0.1 |  |  |  |  |  |  |
| U(GAAAG)A | 2 | 0.1 | UCCUU | 2 | 0.1 |  |  |  |  |  |  |
| G(GAUAA)C | 2 | 0.1 | UUUAG | 2 | 0.1 |  |  |  |  |  |  |
| G(UUUAG)C | 2 | 0.1 | CAACU | 2 | 0.1 |  |  |  |  |  |  |
| U(UUCAA)G | 2 | 0.1 | ACAAA | 2 | 0.1 |  |  |  |  |  |  |
| C(AUUUU)G | 2 | 0.1 | UUUGU | 2 | 0.1 |  |  |  |  |  |  |
| G(GAAAG)C | 2 | 0.1 | AUAAA | 2 | 0.1 |  |  |  |  |  |  |
| U(UCAGU)A | 2 | 0.1 | GUCAU | 2 | 0.1 |  |  |  |  |  |  |
| C(UAAUU)G | 2 | 0.1 | UAGCU | 2 | 0.1 |  |  |  |  |  |  |
| A(CUUGU)U | 2 | 0.1 | UGGUG | 2 | 0.1 |  |  |  |  |  |  |
| U(GACAA)G | 2 | 0.1 | GAAUU | 2 | 0.1 |  |  |  |  |  |  |
| A(GGAGA)U | 2 | 0.1 | ACUUA | 2 | 0.1 |  |  |  |  |  |  |
| C(GUAAG)G | 2 | 0.1 | AAUUC | 2 | 0.1 |  |  |  |  |  |  |
| U(GUAAA)A | 2 | 0.1 | AAUUG | 2 | 0.1 |  |  |  |  |  |  |
| U(UUUAU)A | 2 | 0.1 | ACUAG | 2 | 0.1 |  |  |  |  |  |  |
| G(CUUAU)C | 2 | 0.1 | UCGCC | 2 | 0.1 |  |  |  |  |  |  |
| C(UUUAC)G | 2 | 0.1 | AACUA | 2 | 0.1 |  |  |  |  |  |  |
| G(GCACU)C | 2 | 0.1 | AGCUC | 2 | 0.1 |  |  |  |  |  |  |
| C(UUAGG)G | 2 | 0.1 | AAAAA | 2 | 0.1 |  |  |  |  |  |  |
| G(UUUUU)C | 2 | 0.1 | AAAAG | 2 | 0.1 |  |  |  |  |  |  |
| G(UUUAC)C | 2 | 0.1 | UAAAG | 2 | 0.1 |  |  |  |  |  |  |
| A(GCGAA)U | 2 | 0.1 | GUAUU | 2 | 0.1 |  |  |  |  |  |  |
| U(UGAGU)G | 2 | 0.1 | UCAGU | 2 | 0.1 |  |  |  |  |  |  |
| U(AAUUG)A | 2 | 0.1 | UUGUU | 2 | 0.1 |  |  |  |  |  |  |
| C(CUCGU)G | 2 | 0.1 | CAGCA | 2 | 0.1 |  |  |  |  |  |  |
| A(CUUUU)U | 2 | 0.1 | CGCGA | 2 | 0.1 |  |  |  |  |  |  |
| U(UGAAA)A | 2 | 0.1 | CCACA | 2 | 0.1 |  |  |  |  |  |  |
| A(UAUAU)U | 2 | 0.1 | GAUCA | 2 | 0.1 |  |  |  |  |  |  |
| C(AUGGC)G | 2 | 0.1 | UCAUC | 2 | 0.1 |  |  |  |  |  |  |
| C(GCAAG)G | 2 | 0.1 | UCACC | 2 | 0.1 |  |  |  |  |  |  |
| U(UAUAA)A | 2 | 0.1 | CUAGC | 2 | 0.1 |  |  |  |  |  |  |
| C(GGAAG)G | 2 | 0.1 | UAUGA | 2 | 0.1 |  |  |  |  |  |  |
| U(CAUCA)A | 2 | 0.1 | GCGGC | 2 | 0.1 |  |  |  |  |  |  |
| G(GCCCA)C | 2 | 0.1 | UUCAC | 2 | 0.1 |  |  |  |  |  |  |
| G(UUCAU)C | 2 | 0.1 | CCACC | 2 | 0.1 |  |  |  |  |  |  |
| U(AACUA)A | 2 | 0.1 | ACCAC | 2 | 0.1 |  |  |  |  |  |  |
| A(UACGU)U | 2 | 0.1 | GAGAG | 2 | 0.1 |  |  |  |  |  |  |
| C(AAUCA)G | 2 | 0.1 | CAUCA | 2 | 0.1 |  |  |  |  |  |  |
| G(GGGCA)C | 2 | 0.1 | AUGGC | 2 | 0.1 |  |  |  |  |  |  |
| U(GUCUA)A | 2 | 0.1 | GUUAU | 2 | 0.1 |  |  |  |  |  |  |
| G(AUCAU)C | 2 | 0.1 | UGAAC | 2 | 0.1 |  |  |  |  |  |  |
| C(CAAGU)G | 2 | 0.1 | UUUCC | 2 | 0.1 |  |  |  |  |  |  |
| A(UAUGA)U | 2 | 0.1 | GGAAG | 2 | 0.1 |  |  |  |  |  |  |
| C(GUCAU)G | 2 | 0.1 | GGAAU | 2 | 0.1 |  |  |  |  |  |  |
| U(GGUGA)G | 2 | 0.1 | CUUAU | 2 | 0.1 |  |  |  |  |  |  |
| C(UUAAU)G | 2 | 0.1 | AUCAU | 2 | 0.1 |  |  |  |  |  |  |
| A(GAAAC)U | 2 | 0.1 | GUAAC | 2 | 0.1 |  |  |  |  |  |  |
| G(UUAGG)C | 2 | 0.1 | AAACG | 2 | 0.1 |  |  |  |  |  |  |
| G(GACGA)C | 2 | 0.1 | UUCGA | 2 | 0.1 |  |  |  |  |  |  |
| C(AAACG)G | 2 | 0.1 | GCAAA | 2 | 0.1 |  |  |  |  |  |  |
| C(AUUGC)G | 2 | 0.1 | AUAUU | 2 | 0.1 |  |  |  |  |  |  |
| A(AUCAA)U | 2 | 0.1 | CAGAA | 2 | 0.1 |  |  |  |  |  |  |
| U(AAUUC)A | 2 | 0.1 | AUAUC | 2 | 0.1 |  |  |  |  |  |  |
| C(UUAUC)G | 2 | 0.1 | UACGU | 2 | 0.1 |  |  |  |  |  |  |
| G(UAAUU)U | 2 | 0.1 | GCCCG | 1 | 0.1 |  |  |  |  |  |  |
| G(UAAUC)C | 2 | 0.1 | UCCGC | 1 | 0.1 |  |  |  |  |  |  |
| C(UUCGG)G | 2 | 0.1 | UCCGA | 1 | 0.1 |  |  |  |  |  |  |
| G(CUAGU)C | 2 | 0.1 | UUAAG | 1 | 0.1 |  |  |  |  |  |  |
| U(ACUUA)A | 2 | 0.1 | AGCAA | 1 | 0.1 |  |  |  |  |  |  |
| A(CUUUG)U | 2 | 0.1 | CCAAU | 1 | 0.1 |  |  |  |  |  |  |
| C(ACAAA)G | 2 | 0.1 | UAACC | 1 | 0.1 |  |  |  |  |  |  |
| A(GGUGA)U | 2 | 0.1 | AACAG | 1 | 0.1 |  |  |  |  |  |  |
| C(CCACA)G | 2 | 0.1 | UCUCU | 1 | 0.1 |  |  |  |  |  |  |
| A(GUAAU)U | 2 | 0.1 | GCUUA | 1 | 0.1 |  |  |  |  |  |  |
| C(AUAAA)G | 2 | 0.1 | GUUGU | 1 | 0.1 |  |  |  |  |  |  |
| G(UUCAG)C | 2 | 0.1 | GUGAG | 1 | 0.1 |  |  |  |  |  |  |
| G(UGGUG)U | 2 | 0.1 | GAAGU | 1 | 0.1 |  |  |  |  |  |  |
| C(GCGGC)G | 2 | 0.1 | UAUUU | 1 | 0.1 |  |  |  |  |  |  |
| A(CUUGA)U | 2 | 0.1 | GUACA | 1 | 0.1 |  |  |  |  |  |  |
| A(UUAUU)U | 2 | 0.1 | AGUAA | 1 | 0.1 |  |  |  |  |  |  |
| G(UCCUU)C | 2 | 0.1 | CUUUA | 1 | 0.1 |  |  |  |  |  |  |
| G(AUAAG)C | 2 | 0.1 | AUGUG | 1 | 0.1 |  |  |  |  |  |  |
| C(AAAUU)G | 2 | 0.1 | UCCGG | 1 | 0.1 |  |  |  |  |  |  |
| C(GUAAC)G | 2 | 0.1 | UGUCC | 1 | 0.1 |  |  |  |  |  |  |
| U(GAAGU)G | 1 | 0.1 | CUCUU | 1 | 0.1 |  |  |  |  |  |  |
| U(UUCGG)G | 1 | 0.1 | CUCUG | 1 | 0.1 |  |  |  |  |  |  |
| C(UCACC)G | 1 | 0.1 | CGCAA | 1 | 0.1 |  |  |  |  |  |  |
| U(UUCGC)A | 1 | 0.1 | GCCGU | 1 | 0.1 |  |  |  |  |  |  |
| C(GCGUU)G | 1 | 0.1 | UAGUA | 1 | 0.1 |  |  |  |  |  |  |
| A(UAACG)U | 1 | 0.1 | CACAG | 1 | 0.1 |  |  |  |  |  |  |
| A(CUUGG)U | 1 | 0.1 | UCCCC | 1 | 0.1 |  |  |  |  |  |  |
| C(UUUCC)G | 1 | 0.1 | UAGUU | 1 | 0.1 |  |  |  |  |  |  |
| A(UCGAA)U | 1 | 0.1 | CUCGC | 1 | 0.1 |  |  |  |  |  |  |
| C(UCGCC)G | 1 | 0.1 | CUCGG | 1 | 0.1 |  |  |  |  |  |  |
| C(CCCGU)G | 1 | 0.1 | ACCCC | 1 | 0.1 |  |  |  |  |  |  |
| G(CCAGU)C | 1 | 0.1 | ACCCG | 1 | 0.1 |  |  |  |  |  |  |
| A(UAUAC)U | 1 | 0.1 | UACAA | 1 | 0.1 |  |  |  |  |  |  |
| G(CACAC)C | 1 | 0.1 | UAAGA | 1 | 0.1 |  |  |  |  |  |  |
| G(UAGCU)C | 1 | 0.1 | UUUAA | 1 | 0.1 |  |  |  |  |  |  |
| C(CUCCA)G | 1 | 0.1 | UCAAU | 1 | 0.1 |  |  |  |  |  |  |
| A(UUAUA)U | 1 | 0.1 | CUUGG | 1 | 0.1 |  |  |  |  |  |  |
| C(CACAG)G | 1 | 0.1 | ACCUA | 1 | 0.1 |  |  |  |  |  |  |
| C(AGUGG)G | 1 | 0.1 | UCAAC | 1 | 0.1 |  |  |  |  |  |  |
| U(AGGGC)A | 1 | 0.1 | UCUUC | 1 | 0.1 |  |  |  |  |  |  |
| A(UUACU)U | 1 | 0.1 | UCUUA | 1 | 0.1 |  |  |  |  |  |  |
| G(CCCAG)C | 1 | 0.1 | UAGAU | 1 | 0.1 |  |  |  |  |  |  |
| G(CCAAU)C | 1 | 0.1 | UGCAC | 1 | 0.1 |  |  |  |  |  |  |
| U(UUAUC)A | 1 | 0.1 | ACAAU | 1 | 0.1 |  |  |  |  |  |  |
| A(GCCGU)U | 1 | 0.1 | GAACG | 1 | 0.1 |  |  |  |  |  |  |
| C(GUGAG)G | 1 | 0.1 | CCCAG | 1 | 0.1 |  |  |  |  |  |  |
| G(CAGUU)C | 1 | 0.1 | GGGGA | 1 | 0.1 |  |  |  |  |  |  |
| U(UAGUA)G | 1 | 0.1 | AUAAU | 1 | 0.1 |  |  |  |  |  |  |
| C(UGCUC)G | 1 | 0.1 | CAUAC | 1 | 0.1 |  |  |  |  |  |  |
| U(CUUAG)A | 1 | 0.1 | UUCUC | 1 | 0.1 |  |  |  |  |  |  |
| A(UGAUC)U | 1 | 0.1 | UCGCG | 1 | 0.1 |  |  |  |  |  |  |
| A(GAAUA)U | 1 | 0.1 | CGAAU | 1 | 0.1 |  |  |  |  |  |  |
| A(AAAAG)U | 1 | 0.1 | GCCUU | 1 | 0.1 |  |  |  |  |  |  |
| C(UUUUC)G | 1 | 0.1 | AAGAU | 1 | 0.1 |  |  |  |  |  |  |
| U(UAAAG)G | 1 | 0.1 | UUCUG | 1 | 0.1 |  |  |  |  |  |  |
| G(CCUCA)U | 1 | 0.1 | UAGCC | 1 | 0.1 |  |  |  |  |  |  |
| U(UAAUU)A | 1 | 0.1 | AAUCU | 1 | 0.1 |  |  |  |  |  |  |
| U(GUAAU)A | 1 | 0.1 | GUCUG | 1 | 0.1 |  |  |  |  |  |  |
| A(AUUUU)U | 1 | 0.1 | GAAUG | 1 | 0.1 |  |  |  |  |  |  |
| U(GAAAA)A | 1 | 0.1 | GAUAC | 1 | 0.1 |  |  |  |  |  |  |
| G(UAAUG)U | 1 | 0.1 | GAUAG | 1 | 0.1 |  |  |  |  |  |  |
| A(CAGAG)U | 1 | 0.1 | ACUUU | 1 | 0.1 |  |  |  |  |  |  |
| G(CACGC)C | 1 | 0.1 | GAUAU | 1 | 0.1 |  |  |  |  |  |  |
| G(AUAGG)C | 1 | 0.1 | CUUUC | 1 | 0.1 |  |  |  |  |  |  |
| A(AUCUC)U | 1 | 0.1 | GAGGC | 1 | 0.1 |  |  |  |  |  |  |
| C(GCCCG)G | 1 | 0.1 | GAGGA | 1 | 0.1 |  |  |  |  |  |  |
| U(AUAAU)A | 1 | 0.1 | AUUUC | 1 | 0.1 |  |  |  |  |  |  |
| U(ACCAC)A | 1 | 0.1 | AACUG | 1 | 0.1 |  |  |  |  |  |  |
| G(UUUGU)C | 1 | 0.1 | UCGCU | 1 | 0.1 |  |  |  |  |  |  |
| G(GACAA)C | 1 | 0.1 | CAGGC | 1 | 0.1 |  |  |  |  |  |  |
| A(UCGCU)U | 1 | 0.1 | AUUGU | 1 | 0.1 |  |  |  |  |  |  |
| G(GUAAA)C | 1 | 0.1 | GACAU | 1 | 0.1 |  |  |  |  |  |  |
| G(CAACU)C | 1 | 0.1 | GACAG | 1 | 0.1 |  |  |  |  |  |  |
| G(CUCGA)C | 1 | 0.1 | UUAUG | 1 | 0.1 |  |  |  |  |  |  |
| U(CAGAA)A | 1 | 0.1 | AAUGC | 1 | 0.1 |  |  |  |  |  |  |
| U(GAUAU)G | 1 | 0.1 | UUGGA | 1 | 0.1 |  |  |  |  |  |  |
| U(UAAAU)G | 1 | 0.1 | CACGC | 1 | 0.1 |  |  |  |  |  |  |
| C(GAUAG)G | 1 | 0.1 | UUCCC | 1 | 0.1 |  |  |  |  |  |  |
| G(AAUGA)C | 1 | 0.1 | CACAC | 1 | 0.1 |  |  |  |  |  |  |
| C(GACUA)G | 1 | 0.1 | UUAGC | 1 | 0.1 |  |  |  |  |  |  |
| G(UUAGU)C | 1 | 0.1 | UUAGA | 1 | 0.1 |  |  |  |  |  |  |
| G(UAUAA)U | 1 | 0.1 | CGCCC | 1 | 0.1 |  |  |  |  |  |  |
| C(UCCGC)G | 1 | 0.1 | UACCA | 1 | 0.1 |  |  |  |  |  |  |
| C(CCUGC)G | 1 | 0.1 | UUAGU | 1 | 0.1 |  |  |  |  |  |  |
| A(UAAAU)U | 1 | 0.1 | UAAAC | 1 | 0.1 |  |  |  |  |  |  |
| G(CUCUU)U | 1 | 0.1 | GUAGU | 1 | 0.1 |  |  |  |  |  |  |
| U(UUGUU)A | 1 | 0.1 | CCAGU | 1 | 0.1 |  |  |  |  |  |  |
| A(GAGCA)U | 1 | 0.1 | UCGUC | 1 | 0.1 |  |  |  |  |  |  |
| C(AUUGU)G | 1 | 0.1 | GUGGU | 1 | 0.1 |  |  |  |  |  |  |
| C(GUUAA)G | 1 | 0.1 | UCAGC | 1 | 0.1 |  |  |  |  |  |  |
| U(AAAAA)A | 1 | 0.1 | CCUCA | 1 | 0.1 |  |  |  |  |  |  |
| G(CAAGC)C | 1 | 0.1 | CAGUU | 1 | 0.1 |  |  |  |  |  |  |
| A(GAAAA)U | 1 | 0.1 | UUGUG | 1 | 0.1 |  |  |  |  |  |  |
| C(AAAUG)G | 1 | 0.1 | UUGUC | 1 | 0.1 |  |  |  |  |  |  |
| A(CUAGA)U | 1 | 0.1 | CAGCU | 1 | 0.1 |  |  |  |  |  |  |
| U(CAUGG)A | 1 | 0.1 | CACUG | 1 | 0.1 |  |  |  |  |  |  |
| A(UAUGC)U | 1 | 0.1 | CGUGC | 1 | 0.1 |  |  |  |  |  |  |
| A(CAAUA)U | 1 | 0.1 | UGGCA | 1 | 0.1 |  |  |  |  |  |  |
| C(UGGAA)G | 1 | 0.1 | UGAUA | 1 | 0.1 |  |  |  |  |  |  |
| C(GAGGC)G | 1 | 0.1 | CAUGG | 1 | 0.1 |  |  |  |  |  |  |
| G(AUCUU)C | 1 | 0.1 | UUACU | 1 | 0.1 |  |  |  |  |  |  |
| C(CGUAA)G | 1 | 0.1 | CGCGC | 1 | 0.1 |  |  |  |  |  |  |
| U(GUAAG)A | 1 | 0.1 | AGAAA | 1 | 0.1 |  |  |  |  |  |  |
| C(UUUGA)G | 1 | 0.1 | AUCUC | 1 | 0.1 |  |  |  |  |  |  |
| C(UCAUC)G | 1 | 0.1 | AUCUA | 1 | 0.1 |  |  |  |  |  |  |
| C(GCAAA)G | 1 | 0.1 | AUCUU | 1 | 0.1 |  |  |  |  |  |  |
| U(CCACC)A | 1 | 0.1 | UAUGC | 1 | 0.1 |  |  |  |  |  |  |
| A(UUGUG)U | 1 | 0.1 | UUAUA | 1 | 0.1 |  |  |  |  |  |  |
| C(CUCGG)G | 1 | 0.1 | CUUAG | 1 | 0.1 |  |  |  |  |  |  |
| C(UCAGC)G | 1 | 0.1 | CGCUG | 1 | 0.1 |  |  |  |  |  |  |
| U(GACAG)A | 1 | 0.1 | CGCUC | 1 | 0.1 |  |  |  |  |  |  |
| C(UGUGA)G | 1 | 0.1 | UCACG | 1 | 0.1 |  |  |  |  |  |  |
| U(CAAAC)G | 1 | 0.1 | AGUGA | 1 | 0.1 |  |  |  |  |  |  |
| C(UUCAA)G | 1 | 0.1 | AGUGG | 1 | 0.1 |  |  |  |  |  |  |
| U(UAACA)A | 1 | 0.1 | AUGAG | 1 | 0.1 |  |  |  |  |  |  |
| U(UAAGA)G | 1 | 0.1 | GAUUG | 1 | 0.1 |  |  |  |  |  |  |
| U(AUAUU)A | 1 | 0.1 | CCUGC | 1 | 0.1 |  |  |  |  |  |  |
| C(GGUGG)G | 1 | 0.1 | UACGA | 1 | 0.1 |  |  |  |  |  |  |
| C(GAUGG)G | 1 | 0.1 | ACACA | 1 | 0.1 |  |  |  |  |  |  |
| U(AUUGC)A | 1 | 0.1 | GCAUA | 1 | 0.1 |  |  |  |  |  |  |
| C(UCGUC)G | 1 | 0.1 | CUGGG | 1 | 0.1 |  |  |  |  |  |  |
| G(UUCUG)C | 1 | 0.1 | GAGAC | 1 | 0.1 |  |  |  |  |  |  |
| C(GAGAG)G | 1 | 0.1 | UGUAG | 1 | 0.1 |  |  |  |  |  |  |
| U(AUUAG)A | 1 | 0.1 | CUGGC | 1 | 0.1 |  |  |  |  |  |  |
| A(CAAGU)U | 1 | 0.1 | UGUAU | 1 | 0.1 |  |  |  |  |  |  |
| U(AAACU)A | 1 | 0.1 | GGCGU | 1 | 0.1 |  |  |  |  |  |  |
| G(ACUUU)C | 1 | 0.1 | GUGAA | 1 | 0.1 |  |  |  |  |  |  |
| C(CGCGA)G | 1 | 0.1 | GACUA | 1 | 0.1 |  |  |  |  |  |  |
| U(GUUUA)A | 1 | 0.1 | CUCCG | 1 | 0.1 |  |  |  |  |  |  |
| C(GUAUU)G | 1 | 0.1 | AAUGA | 1 | 0.1 |  |  |  |  |  |  |
| C(UUAAG)G | 1 | 0.1 | UAUCG | 1 | 0.1 |  |  |  |  |  |  |
| U(CUUGA)A | 1 | 0.1 | AAUAC | 1 | 0.1 |  |  |  |  |  |  |
| U(GCAAG)A | 1 | 0.1 | UACUA | 1 | 0.1 |  |  |  |  |  |  |
| U(GUUAU)G | 1 | 0.1 | UUUCA | 1 | 0.1 |  |  |  |  |  |  |
| A(UGUAU)U | 1 | 0.1 | CUCCA | 1 | 0.1 |  |  |  |  |  |  |
| A(GCAUA)U | 1 | 0.1 | CACUA | 1 | 0.1 |  |  |  |  |  |  |
| G(UCAUC)C | 1 | 0.1 | CAAAC | 1 | 0.1 |  |  |  |  |  |  |
| C(CACGU)G | 1 | 0.1 | GUCAG | 1 | 0.1 |  |  |  |  |  |  |
| C(UGAUA)G | 1 | 0.1 | GCGCG | 1 | 0.1 |  |  |  |  |  |  |
| U(GUAUA)G | 1 | 0.1 | GGAAA | 1 | 0.1 |  |  |  |  |  |  |
| G(UUCCC)C | 1 | 0.1 | CUAGA | 1 | 0.1 |  |  |  |  |  |  |
| C(UAGCC)G | 1 | 0.1 | AAAUG | 1 | 0.1 |  |  |  |  |  |  |
| C(CUAGC)G | 1 | 0.1 | GCGUC | 1 | 0.1 |  |  |  |  |  |  |
| G(AUGAG)C | 1 | 0.1 | GCGUA | 1 | 0.1 |  |  |  |  |  |  |
| C(UAUCG)G | 1 | 0.1 | GCGUU | 1 | 0.1 |  |  |  |  |  |  |
| C(UGGAU)G | 1 | 0.1 | CUAAC | 1 | 0.1 |  |  |  |  |  |  |
| A(GUCAA)U | 1 | 0.1 | ACGGC | 1 | 0.1 |  |  |  |  |  |  |
| A(UUGGA)U | 1 | 0.1 | CUAAA | 1 | 0.1 |  |  |  |  |  |  |
| A(GUUAU)U | 1 | 0.1 | ACAUA | 1 | 0.1 |  |  |  |  |  |  |
| U(UAACC)G | 1 | 0.1 | GGUGG | 1 | 0.1 |  |  |  |  |  |  |
| U(UAGUU)A | 1 | 0.1 | UCGAA | 1 | 0.1 |  |  |  |  |  |  |
| G(CGAUA)C | 1 | 0.1 | GGCCG | 1 | 0.1 |  |  |  |  |  |  |
| U(CAGAA)G | 1 | 0.1 | UCGAU | 1 | 0.1 |  |  |  |  |  |  |
| U(CGCGA)A | 1 | 0.1 | AUACA | 1 | 0.1 |  |  |  |  |  |  |
| C(UCUCU)G | 1 | 0.1 | UUUUA | 1 | 0.1 |  |  |  |  |  |  |
| A(GGAAU)U | 1 | 0.1 | UUUUC | 1 | 0.1 |  |  |  |  |  |  |
| U(ACAUA)A | 1 | 0.1 | UAGAC | 1 | 0.1 |  |  |  |  |  |  |
| U(UUCGU)G | 1 | 0.1 | UAGAA | 1 | 0.1 |  |  |  |  |  |  |
| C(UCAAU)G | 1 | 0.1 | AAAGA | 1 | 0.1 |  |  |  |  |  |  |
| G(CAAUU)C | 1 | 0.1 | UGCUA | 1 | 0.1 |  |  |  |  |  |  |
| C(UAUAU)G | 1 | 0.1 | UGCUC | 1 | 0.1 |  |  |  |  |  |  |
| U(GCAAA)A | 1 | 0.1 | AAGUG | 1 | 0.1 |  |  |  |  |  |  |
| U(CUAGU)A | 1 | 0.1 | GUCUC | 1 | 0.1 |  |  |  |  |  |  |
| C(CGCGC)G | 1 | 0.1 | CCCGU | 1 | 0.1 |  |  |  |  |  |  |
| U(UAGAU)A | 1 | 0.1 | AGGGC | 1 | 0.1 |  |  |  |  |  |  |
| G(CAAUU)U | 1 | 0.1 | CAAUA | 1 | 0.1 |  |  |  |  |  |  |
| A(UAGAA)U | 1 | 0.1 | GAUGG | 1 | 0.1 |  |  |  |  |  |  |
| U(AUGAU)G | 1 | 0.1 | UCCCA | 1 | 0.1 |  |  |  |  |  |  |
| U(UUUAA)A | 1 | 0.1 | CACGU | 1 | 0.1 |  |  |  |  |  |  |
| G(UCUUC)C | 1 | 0.1 | UGCGC | 1 | 0.1 |  |  |  |  |  |  |
| G(AUAUC)C | 1 | 0.1 | AUGAU | 1 | 0.1 |  |  |  |  |  |  |
| C(GAUUA)G | 1 | 0.1 | CGAUA | 1 | 0.1 |  |  |  |  |  |  |
| C(UACUA)G | 1 | 0.1 | UUGAG | 1 | 0.1 |  |  |  |  |  |  |
| C(CGAGU)G | 1 | 0.1 | GAGAU | 1 | 0.1 |  |  |  |  |  |  |
| U(GAGAA)G | 1 | 0.1 | GAUUA | 1 | 0.1 |  |  |  |  |  |  |
| U(GUUUU)A | 1 | 0.1 | AAACU | 1 | 0.1 |  |  |  |  |  |  |
| U(GAACG)A | 1 | 0.1 | AUAGG | 1 | 0.1 |  |  |  |  |  |  |
| U(GUUUU)G | 1 | 0.1 | AUAGA | 1 | 0.1 |  |  |  |  |  |  |
| G(AAUCU)C | 1 | 0.1 | CGAGU | 1 | 0.1 |  |  |  |  |  |  |
| U(UUUCC)A | 1 | 0.1 | CAAGC | 1 | 0.1 |  |  |  |  |  |  |
| C(ACCUA)G | 1 | 0.1 | AUUAG | 1 | 0.1 |  |  |  |  |  |  |
| G(UAAAC)C | 1 | 0.1 | UGUGA | 1 | 0.1 |  |  |  |  |  |  |
| U(GGAAA)A | 1 | 0.1 | CAGAG | 1 | 0.1 |  |  |  |  |  |  |
| C(UCCCA)G | 1 | 0.1 | UGGAA | 1 | 0.1 |  |  |  |  |  |  |
| U(GCGUA)A | 1 | 0.1 | UGGAU | 1 | 0.1 |  |  |  |  |  |  |
| U(AUACA)G | 1 | 0.1 |  |  |  |  |  |  |  |  |  |
| G(UUAUU)C | 1 | 0.1 |  |  |  |  |  |  |  |  |  |
| U(GAAUA)A | 1 | 0.1 |  |  |  |  |  |  |  |  |  |
| C(AACUG)G | 1 | 0.1 |  |  |  |  |  |  |  |  |  |
| G(CAAGU)U | 1 | 0.1 |  |  |  |  |  |  |  |  |  |
| U(GAUAC)A | 1 | 0.1 |  |  |  |  |  |  |  |  |  |
| C(CUUUG)G | 1 | 0.1 |  |  |  |  |  |  |  |  |  |
| C(GGAAU)G | 1 | 0.1 |  |  |  |  |  |  |  |  |  |
| U(AAAGA)A | 1 | 0.1 |  |  |  |  |  |  |  |  |  |
| C(CUAAC)G | 1 | 0.1 |  |  |  |  |  |  |  |  |  |
| U(AAACA)A | 1 | 0.1 |  |  |  |  |  |  |  |  |  |
| C(CUCGC)G | 1 | 0.1 |  |  |  |  |  |  |  |  |  |
| U(UAAUA)A | 1 | 0.1 |  |  |  |  |  |  |  |  |  |
| C(UAACA)G | 1 | 0.1 |  |  |  |  |  |  |  |  |  |
| U(CAAAU)G | 1 | 0.1 |  |  |  |  |  |  |  |  |  |
| U(CUAAA)A | 1 | 0.1 |  |  |  |  |  |  |  |  |  |
| U(GUUGU)A | 1 | 0.1 |  |  |  |  |  |  |  |  |  |
| C(GAAUG)G | 1 | 0.1 |  |  |  |  |  |  |  |  |  |
| G(AUUGC)C | 1 | 0.1 |  |  |  |  |  |  |  |  |  |
| C(CUAGU)G | 1 | 0.1 |  |  |  |  |  |  |  |  |  |
| C(UUCAG)G | 1 | 0.1 |  |  |  |  |  |  |  |  |  |
| U(GGUAA)A | 1 | 0.1 |  |  |  |  |  |  |  |  |  |
| G(AAACA)C | 1 | 0.1 |  |  |  |  |  |  |  |  |  |
| C(CACAA)G | 1 | 0.1 |  |  |  |  |  |  |  |  |  |
| U(UAAAG)A | 1 | 0.1 |  |  |  |  |  |  |  |  |  |
| C(CACUG)G | 1 | 0.1 |  |  |  |  |  |  |  |  |  |
| U(UUAUU)G | 1 | 0.1 |  |  |  |  |  |  |  |  |  |
| G(GCGCG)C | 1 | 0.1 |  |  |  |  |  |  |  |  |  |
| G(UUGAG)C | 1 | 0.1 |  |  |  |  |  |  |  |  |  |
| C(ACCAA)G | 1 | 0.1 |  |  |  |  |  |  |  |  |  |
| U(GAAAC)A | 1 | 0.1 |  |  |  |  |  |  |  |  |  |
| U(CAGCA)G | 1 | 0.1 |  |  |  |  |  |  |  |  |  |
| C(GCUUA)G | 1 | 0.1 |  |  |  |  |  |  |  |  |  |
| C(AAAGC)G | 1 | 0.1 |  |  |  |  |  |  |  |  |  |
| U(GACAU)G | 1 | 0.1 |  |  |  |  |  |  |  |  |  |
| C(UUCAC)G | 1 | 0.1 |  |  |  |  |  |  |  |  |  |
| A(AAAGC)U | 1 | 0.1 |  |  |  |  |  |  |  |  |  |
| U(AUAGA)G | 1 | 0.1 |  |  |  |  |  |  |  |  |  |
| U(UCUUA)G | 1 | 0.1 |  |  |  |  |  |  |  |  |  |
| C(GAAUU)G | 1 | 0.1 |  |  |  |  |  |  |  |  |  |
| C(CUUUC)G | 1 | 0.1 |  |  |  |  |  |  |  |  |  |
| C(AGCUC)G | 1 | 0.1 |  |  |  |  |  |  |  |  |  |
| A(CGUGC)U | 1 | 0.1 |  |  |  |  |  |  |  |  |  |
| U(ACCAA)G | 1 | 0.1 |  |  |  |  |  |  |  |  |  |
| G(CGAAA)U | 1 | 0.1 |  |  |  |  |  |  |  |  |  |
| C(GUCAA)G | 1 | 0.1 |  |  |  |  |  |  |  |  |  |
| C(UUAGC)G | 1 | 0.1 |  |  |  |  |  |  |  |  |  |
| U(CUGGC)G | 1 | 0.1 |  |  |  |  |  |  |  |  |  |
| U(UAACA)G | 1 | 0.1 |  |  |  |  |  |  |  |  |  |
| C(UUCUU)G | 1 | 0.1 |  |  |  |  |  |  |  |  |  |
| G(UUCAU)U | 1 | 0.1 |  |  |  |  |  |  |  |  |  |
| C(CUCUG)G | 1 | 0.1 |  |  |  |  |  |  |  |  |  |
| C(AAGUG)G | 1 | 0.1 |  |  |  |  |  |  |  |  |  |
| C(GGAGA)G | 1 | 0.1 |  |  |  |  |  |  |  |  |  |
| C(ACGGC)G | 1 | 0.1 |  |  |  |  |  |  |  |  |  |
| A(GAAGA)U | 1 | 0.1 |  |  |  |  |  |  |  |  |  |
| G(GUCUC)C | 1 | 0.1 |  |  |  |  |  |  |  |  |  |
| G(UCCCC)C | 1 | 0.1 |  |  |  |  |  |  |  |  |  |
| G(UAAAU)U | 1 | 0.1 |  |  |  |  |  |  |  |  |  |
| C(CGCUG)G | 1 | 0.1 |  |  |  |  |  |  |  |  |  |
| U(AGCAA)A | 1 | 0.1 |  |  |  |  |  |  |  |  |  |
| U(GAUCA)G | 1 | 0.1 |  |  |  |  |  |  |  |  |  |
| C(CGCUC)G | 1 | 0.1 |  |  |  |  |  |  |  |  |  |
| C(CAGCA)G | 1 | 0.1 |  |  |  |  |  |  |  |  |  |
| G(UCCGG)C | 1 | 0.1 |  |  |  |  |  |  |  |  |  |
| A(AACAG)U | 1 | 0.1 |  |  |  |  |  |  |  |  |  |
| U(AAAGC)G | 1 | 0.1 |  |  |  |  |  |  |  |  |  |
| G(GAAUU)C | 1 | 0.1 |  |  |  |  |  |  |  |  |  |
| G(GAAAU)C | 1 | 0.1 |  |  |  |  |  |  |  |  |  |
| U(UUAUG)A | 1 | 0.1 |  |  |  |  |  |  |  |  |  |
| U(UUCAU)A | 1 | 0.1 |  |  |  |  |  |  |  |  |  |
| C(AAUUA)G | 1 | 0.1 |  |  |  |  |  |  |  |  |  |
| C(UCACG)G | 1 | 0.1 |  |  |  |  |  |  |  |  |  |
| U(UUAGA)G | 1 | 0.1 |  |  |  |  |  |  |  |  |  |
| C(UCGCG)G | 1 | 0.1 |  |  |  |  |  |  |  |  |  |
| A(GCCUU)U | 1 | 0.1 |  |  |  |  |  |  |  |  |  |
| G(UGAAC)C | 1 | 0.1 |  |  |  |  |  |  |  |  |  |
| C(GGGGA)G | 1 | 0.1 |  |  |  |  |  |  |  |  |  |
| A(GAGGA)U | 1 | 0.1 |  |  |  |  |  |  |  |  |  |
| C(UAAAA)G | 1 | 0.1 |  |  |  |  |  |  |  |  |  |
| C(GGCGU)G | 1 | 0.1 |  |  |  |  |  |  |  |  |  |
| G(UAACA)C | 1 | 0.1 |  |  |  |  |  |  |  |  |  |
| C(AGAAA)G | 1 | 0.1 |  |  |  |  |  |  |  |  |  |
| U(CAGGC)A | 1 | 0.1 |  |  |  |  |  |  |  |  |  |
| G(CGUAA)C | 1 | 0.1 |  |  |  |  |  |  |  |  |  |
| C(GAGCA)G | 1 | 0.1 |  |  |  |  |  |  |  |  |  |
| U(GAGAU)A | 1 | 0.1 |  |  |  |  |  |  |  |  |  |
| C(ACCAC)G | 1 | 0.1 |  |  |  |  |  |  |  |  |  |
| G(UUCGG)U | 1 | 0.1 |  |  |  |  |  |  |  |  |  |
| G(AUAUU)C | 1 | 0.1 |  |  |  |  |  |  |  |  |  |
| U(ACACA)A | 1 | 0.1 |  |  |  |  |  |  |  |  |  |
| U(CUCGA)A | 1 | 0.1 |  |  |  |  |  |  |  |  |  |
| G(UGCUA)U | 1 | 0.1 |  |  |  |  |  |  |  |  |  |
| G(AAAAG)C | 1 | 0.1 |  |  |  |  |  |  |  |  |  |
| C(UACAA)G | 1 | 0.1 |  |  |  |  |  |  |  |  |  |
| G(AAAAA)U | 1 | 0.1 |  |  |  |  |  |  |  |  |  |
| C(UGGCA)G | 1 | 0.1 |  |  |  |  |  |  |  |  |  |
| C(GCGUC)G | 1 | 0.1 |  |  |  |  |  |  |  |  |  |
| C(GAGAA)G | 1 | 0.1 |  |  |  |  |  |  |  |  |  |
| A(UUGUC)U | 1 | 0.1 |  |  |  |  |  |  |  |  |  |
| C(CAGCU)G | 1 | 0.1 |  |  |  |  |  |  |  |  |  |
| U(UGCAC)A | 1 | 0.1 |  |  |  |  |  |  |  |  |  |
| G(UUCGA)C | 1 | 0.1 |  |  |  |  |  |  |  |  |  |
| U(AGUAA)A | 1 | 0.1 |  |  |  |  |  |  |  |  |  |
| G(GGCCG)C | 1 | 0.1 |  |  |  |  |  |  |  |  |  |
| C(CACUA)G | 1 | 0.1 |  |  |  |  |  |  |  |  |  |
| G(AGCUC)C | 1 | 0.1 |  |  |  |  |  |  |  |  |  |
| G(CCACC)C | 1 | 0.1 |  |  |  |  |  |  |  |  |  |
| U(GGUGA)A | 1 | 0.1 |  |  |  |  |  |  |  |  |  |
| G(AAAUU)C | 1 | 0.1 |  |  |  |  |  |  |  |  |  |
| C(GUGAA)G | 1 | 0.1 |  |  |  |  |  |  |  |  |  |
| U(AAUAC)A | 1 | 0.1 |  |  |  |  |  |  |  |  |  |
| A(GACAA)U | 1 | 0.1 |  |  |  |  |  |  |  |  |  |
| C(UUUUA)G | 1 | 0.1 |  |  |  |  |  |  |  |  |  |
| C(GUCAG)G | 1 | 0.1 |  |  |  |  |  |  |  |  |  |
| U(AUGUG)A | 1 | 0.1 |  |  |  |  |  |  |  |  |  |
| C(CGAAA)G | 1 | 0.1 |  |  |  |  |  |  |  |  |  |
| G(UUCAC)C | 1 | 0.1 |  |  |  |  |  |  |  |  |  |
| U(UCGCC)G | 1 | 0.1 |  |  |  |  |  |  |  |  |  |
| U(ACUAG)A | 1 | 0.1 |  |  |  |  |  |  |  |  |  |
| U(CUCCG)G | 1 | 0.1 |  |  |  |  |  |  |  |  |  |
| C(UAGAC)G | 1 | 0.1 |  |  |  |  |  |  |  |  |  |
| U(UGAAC)G | 1 | 0.1 |  |  |  |  |  |  |  |  |  |
| G(CUAGC)C | 1 | 0.1 |  |  |  |  |  |  |  |  |  |
| U(ACCCC)A | 1 | 0.1 |  |  |  |  |  |  |  |  |  |
| G(CUUUU)U | 1 | 0.1 |  |  |  |  |  |  |  |  |  |
| U(CUUUA)A | 1 | 0.1 |  |  |  |  |  |  |  |  |  |
| A(UUGUU)U | 1 | 0.1 |  |  |  |  |  |  |  |  |  |
| G(UCGAU)C | 1 | 0.1 |  |  |  |  |  |  |  |  |  |
| C(UACCA)G | 1 | 0.1 |  |  |  |  |  |  |  |  |  |
| U(GUAUU)A | 1 | 0.1 |  |  |  |  |  |  |  |  |  |
| G(UGUCC)U | 1 | 0.1 |  |  |  |  |  |  |  |  |  |
| G(CAUAC)C | 1 | 0.1 |  |  |  |  |  |  |  |  |  |
| C(UUUGU)G | 1 | 0.1 |  |  |  |  |  |  |  |  |  |
| U(GAUUG)A | 1 | 0.1 |  |  |  |  |  |  |  |  |  |
| G(ACCCG)C | 1 | 0.1 |  |  |  |  |  |  |  |  |  |
| C(UGCGC)G | 1 | 0.1 |  |  |  |  |  |  |  |  |  |
| C(GGGCA)G | 1 | 0.1 |  |  |  |  |  |  |  |  |  |
| C(GAGAC)G | 1 | 0.1 |  |  |  |  |  |  |  |  |  |
| G(GUUUC)U | 1 | 0.1 |  |  |  |  |  |  |  |  |  |
| C(AAGAU)G | 1 | 0.1 |  |  |  |  |  |  |  |  |  |
| C(UACGA)G | 1 | 0.1 |  |  |  |  |  |  |  |  |  |
| A(GAGAG)U | 1 | 0.1 |  |  |  |  |  |  |  |  |  |
| G(GUUUC)C | 1 | 0.1 |  |  |  |  |  |  |  |  |  |
| C(ACUAA)G | 1 | 0.1 |  |  |  |  |  |  |  |  |  |
| C(UUCUC)G | 1 | 0.1 |  |  |  |  |  |  |  |  |  |
| U(AAACA)G | 1 | 0.1 |  |  |  |  |  |  |  |  |  |
| G(UCACC)C | 1 | 0.1 |  |  |  |  |  |  |  |  |  |
| U(ACAAU)A | 1 | 0.1 |  |  |  |  |  |  |  |  |  |
| C(UCCGA)G | 1 | 0.1 |  |  |  |  |  |  |  |  |  |
| U(AUCUA)A | 1 | 0.1 |  |  |  |  |  |  |  |  |  |
| C(UAGCU)G | 1 | 0.1 |  |  |  |  |  |  |  |  |  |
| U(UCAAC)G | 1 | 0.1 |  |  |  |  |  |  |  |  |  |
| C(AUAUC)G | 1 | 0.1 |  |  |  |  |  |  |  |  |  |
| U(GUACA)A | 1 | 0.1 |  |  |  |  |  |  |  |  |  |
| C(GUCUG)G | 1 | 0.1 |  |  |  |  |  |  |  |  |  |
| G(CGCCC)C | 1 | 0.1 |  |  |  |  |  |  |  |  |  |
| U(UGAAA)G | 1 | 0.1 |  |  |  |  |  |  |  |  |  |
| C(CUGGG)G | 1 | 0.1 |  |  |  |  |  |  |  |  |  |
| A(AAUCA)U | 1 | 0.1 |  |  |  |  |  |  |  |  |  |
| U(GAAGA)A | 1 | 0.1 |  |  |  |  |  |  |  |  |  |
| C(UGUAG)G | 1 | 0.1 |  |  |  |  |  |  |  |  |  |
| C(GAUCA)G | 1 | 0.1 |  |  |  |  |  |  |  |  |  |
| A(UUUCA)U | 1 | 0.1 |  |  |  |  |  |  |  |  |  |
| U(GAUGA)G | 1 | 0.1 |  |  |  |  |  |  |  |  |  |
| G(ACUAG)U | 1 | 0.1 |  |  |  |  |  |  |  |  |  |
| U(GAUGA)A | 1 | 0.1 |  |  |  |  |  |  |  |  |  |
| C(UAUAC)G | 1 | 0.1 |  |  |  |  |  |  |  |  |  |
| G(UUCGU)U | 1 | 0.1 |  |  |  |  |  |  |  |  |  |
| U(CGAAU)G | 1 | 0.1 |  |  |  |  |  |  |  |  |  |
| C(UAUUU)G | 1 | 0.1 |  |  |  |  |  |  |  |  |  |
| A(GUGGU)U | 1 | 0.1 |  |  |  |  |  |  |  |  |  |
| C(AGUGA)G | 1 | 0.1 |  |  |  |  |  |  |  |  |  |
| A(CAAUU)U | 1 | 0.1 |  |  |  |  |  |  |  |  |  |
| C(AUUUC)G | 1 | 0.1 |  |  |  |  |  |  |  |  |  |
| G(UGAGU)U | 1 | 0.1 |  |  |  |  |  |  |  |  |  |
| C(UAAAU)G | 1 | 0.1 |  |  |  |  |  |  |  |  |  |
| C(UUCGA)G | 1 | 0.1 |  |  |  |  |  |  |  |  |  |
| C(CAACU)G | 1 | 0.1 |  |  |  |  |  |  |  |  |  |
| U(AAUGC)A | 1 | 0.1 |  |  |  |  |  |  |  |  |  |
| U(UAAUG)G | 1 | 0.1 |  |  |  |  |  |  |  |  |  |
| U(UAACU)A | 1 | 0.1 |  |  |  |  |  |  |  |  |  |
| G(UUUGA)U | 1 | 0.1 |  |  |  |  |  |  |  |  |  |
| A(GUAGU)U | 1 | 0.1 |  |  |  |  |  |  |  |  |  |
| G(UUUGA)C | 1 | 0.1 |  |  |  |  |  |  |  |  |  |
| C(UAAUA)G | 1 | 0.1 |  |  |  |  |  |  |  |  |  |
| C(CGCAA)G | 1 | 0.1 |  |  |  |  |  |  |  |  |  |

aSequences are written 5’-3’. In data set 1, parentheses were added to designate the loop sequence.

bFrequency of occurrence in the secondary structure database.

cPercent of the total pentaloops found.

Table S2: Comparison between experimental and predicted enthalpy change

| **Sequencea** | **ΔHº37 (kcal/mol)** | **Stem contribution (kcal/mol)** | **Exp ΔH°37,pentaloopb (kcal/mol)** | **Predicted ΔH°37,pentaloopc (kcal/mol)** | **ΔΔH°37,pentaloopd (kcal/mol)** |
| --- | --- | --- | --- | --- | --- |
| C(CUUGU)G | -48.5 | -36.7 | -11.8 | -7.4 | 4.3 |
| C(GUAAA)G | -39.8 | -28.3 | -11.5 | -7.4 | 4.1 |
| G(UUCGU)C | -44.0 | -32.5 | -11.5 | -4.6 | 6.9 |
| C(GGCGA)G | -47.5 | -36.7 | -10.8 | -7.4 | 3.4 |
| G(UAAAU)U | -33.7 | -23.0 | -10.7 | -4.1 | 6.6 |
| A(GAAAU)U | -42.0 | -34.2 | -7.8 | -4.6 | 3.2 |
| C(UGUUC)G | -44.2 | -36.7 | -7.5 | -7.4 | 0.1 |
| A(GAGAA)U | -40.7 | -34.2 | -6.5 | -4.6 | 1.9 |
| U(GAACA)G | -41.4 | -35.0 | -6.4 | -4.6 | 1.9 |
| G(UAAUU)C | -39.8 | -34.5 | -5.3 | -4.6 | 0.8 |
| U(GAAAU)G | -42.5 | -37.7 | -4.8 | -4.6 | 0.2 |
| U(GAAAG)G | -38.7 | -35.0 | -3.7 | -4.6 | -0.9 |
| C(AUUUA)G | -31.6 | -28.3 | -3.3 | -3.7 | -0.4 |
| G(UAAAU)C | -39.4 | -36.2 | -3.2 | -4.6 | -1.4 |
| U(AUCAA)A | -36.1 | -33.2 | -2.9 | -0.8 | 2.1 |
| U(GAAUA)G | -37.6 | -35.0 | -2.6 | -4.6 | -1.9 |
| G(AUUUA)C | -29.3 | -26.8 | -2.5 | -0.8 | 1.7 |
| U(AAUUA)A | -35.5 | -33.2 | -2.3 | -0.8 | 1.5 |
| G(GUAAG)C | -35.7 | -33.6 | -2.2 | -4.6 | -2.4 |
| U(AUUUA)A | -23.2 | -21.1 | -2.1 | -0.8 | 1.3 |
| U(AUUUA)G | -26.5 | -24.5 | -2.0 | -0.8 | 1.2 |
| A(AUUUA)U | -23.9 | -22.1 | -1.8 | -0.8 | 1.0 |
| U(AUCAA)G | -37.6 | -36.6 | -1.0 | -0.8 | 0.2 |
| G(GAAGA)U | -21.4 | -20.4 | -1.0 | -4.1 | -3.2 |
| G(UAAGU)U | -28.6 | -28.0 | -0.7 | -4.1 | -3.4 |
| C(AUCCC)G | -24.1 | -23.8 | -0.3 | -7.4 | -7.2 |
| U(ACCAA)A | -32.3 | -32.3 | -0.1 | -0.8 | -0.8 |
| C(AUAUA)G | -27.6 | -28.3 | 0.7 | -3.7 | -4.4 |
| G(CUCAA)C | -32.7 | -34.5 | 1.8 | -4.6 | -6.4 |
| G(AAUGC)C | -31.5 | -33.6 | 2.1 | -4.6 | -6.7 |
| U(AAUUA)G | -34.1 | -36.6 | 2.5 | -0.8 | -3.3 |
| |Average| |  |  |  |  | 2.7 |

aSequences are written 5’-3’, and parentheses were added to designate the loop sequence. Sequences are listed from most negative enthalpic contribution to most positive enthalpic contribution.

bChange of enthalpy for loop formation calculated by subtracting the contribution of the base pairs in the stem from the experimental change of enthalpy for the stem-loop formation. Values for the previously published pentaloops were recalculated here.

cPredicted change of enthalpy for loop formation using the current model (Eqs 1 and 2).

dDifference between experimental and predicted change of enthalpy for loop formation. Positive and negative difference indicate unstable and stable prediction, respectively, of enthalpy change compared to the experimental enthalpy change.
